# Supplementary material for: The Conversion of Evodiamine-induced Hepatotoxicity into a Therapeutic Effect on Colonitis: Insight from the Liver-Gut Axis Mediated by PPAR/NF-κB/ZO-1/caspase-3 Pathway
Source: Research Square preprint supplement (doi:10.21203/rs.3.rs-7515324/v1), 2025-09-19
Supplement: Supplementary file 1 [file a0bfddaa36525bc3c1efbdaa.docx]

Table S1 The primer sequences used in qPCR analysis.

| gene | Forward Primer sequence(5'-3') | Reverse Primer sequence(5'-3') |
| --- | --- | --- |
| BSEP | TGAATGGACTGTCGGTATCTGTG | CCACTGCTCCCAACGAATG |
| MRP2 | CTTGCTGTGGTCCAGTGTTTTAC | ATGGCGAATGGCAGACAA |
| CYP7A1 | AACAACCTGCCAGTACTAGATAGC | GTGTAGAGTGAAGTCCTCCTTAGC |
| CYP27A1 | GCCTCACCTATGGGATCTTCA | TCAAAGCCTGACGCAGATG |
| GAPDH | AGGTCGGTGTGAACGGATTTG | TGTAGACCATGTAGTTGAGGTCA |

Table S2 Antibodies in Western blotting.

| Antibody | Manufacturer | Catalog Number |
| --- | --- | --- |
| β-actin | ABclonal | AC026 |
| PPARα | Santa | sc-398394 |
| p-p65 | Proteintech | 82335-1-RR |
| ZO-1 | Affinity | AF5145 |
| Occludin | abcam | ab216327 |
| Caspase3(human) | abcam | ab32351 |
| Caspase3(mouse) | Servicebio | GB11767C |
| BSEP | Proteintech | 67512-1-Ig |
| MRP2 | abcam | ab172630 |
| CYP7A1 | Proteintech | 14739-1-AP |
| CYP27A1 | Beyotime | AF6657 |
| TNFα | Servicebio | GB12188 |

Table S3 The primer sequences used in siRNA synthesis.

| siRNA | Sense strand sequence (5'-3') | antisense strand sequence (5'-3') |
| --- | --- | --- |
| ZO-1 | GCGAUCUCAUAAACUUCGUAAdTdT | UUACGAAGUUUAUGAGAGAUCGCdTdT |
| Negative Control | UUCUCCGAACGUGUCACGUdTdT | ACGUGACACGUUCGGAGAAdTdT |

Table S4 The OPLS-DA results of metabolomic analysis on L02 cells.

| Scan mode | Comparison | R2X(cum) | R2Y(cum) | Q2 |
| --- | --- | --- | --- | --- |
| ESI+ | Ctrl vs EVO-L | 0.280 | 0.999 | 0.758 |
|  | Ctrl vs EVO-H | 0.565 | 0.997 | 0.927 |
| ESI- | Ctrl vs EVO-L | 0.329 | 0.996 | 0.798 |
|  | Ctrl vs EVO-H | 0.596 | 0.995 | 0.859 |
| Note: R2X(cum) = Cumulative explained fraction of X variation; R2Y(cum) = Cumulative explained fraction of Y variation; Q2 = Cumulative predicted fraction | | | | |

Table S5 Quality testing results of samples in RNA-Seq analysis.

| No. | Sample | Concentration(ng/μL) | Content(μg) | OD260/280 | OD260/230 |
| --- | --- | --- | --- | --- | --- |
| 1 | Ctrl-1 | 1394.4 | 48.8 | 2.09 | 2.3 |
| 2 | Ctrl-2 | 1322.3 | 46.28 | 2.12 | 2.34 |
| 3 | Ctrl-3 | 977.7 | 34.22 | 2.12 | 2.33 |
| 4 | EVO-L-1 | 1406.6 | 119.56 | 2.09 | 2.23 |
| 5 | EVO-L-2 | 1273.3 | 108.23 | 2.11 | 2.3 |
| 6 | EVO-L-3 | 1326.4 | 112.74 | 2.09 | 2.24 |
| 7 | EVO-H-1 | 2343.1 | 82.01 | 2.04 | 2.16 |
| 8 | EVO-H-2 | 2385.7 | 83.5 | 2.04 | 2.15 |
| 9 | EVO-H-3 | 2212.6 | 77.44 | 2.06 | 2.2 |

Table S6 Overview of transcriptome sequencing data for samples.

| Sample | Raw reads | Raw bases | Clean reads | Clean bases | Error rate(%) | Q20 (%) | Q30 (%) | GC content(%) |
| --- | --- | --- | --- | --- | --- | --- | --- | --- |
| Ctrl-1 | 56296896 | 8500831296 | 55557496 | 8183838999 | 0.0256 | 97.72 | 93.62 | 56.07 |
| Ctrl -2 | 50187046 | 7578243946 | 49663000 | 7336301757 | 0.0254 | 97.82 | 93.75 | 52.69 |
| Ctrl -3 | 50460384 | 7619517984 | 49861816 | 7318330144 | 0.0256 | 97.75 | 93.59 | 52.62 |
| EVO-L-1 | 55217836 | 8337893236 | 54219648 | 7870787497 | 0.0251 | 97.92 | 94.13 | 54.2 |
| EVO-L-2 | 50115106 | 7567381006 | 49444758 | 7288112061 | 0.0252 | 97.89 | 93.98 | 53.37 |
| EVO-L-3 | 52380642 | 7909476942 | 51793256 | 7697807000 | 0.0252 | 97.9 | 93.95 | 53.72 |
| EVO-H-1 | 50522126 | 7628841026 | 49770486 | 7317892282 | 0.0258 | 97.66 | 93.41 | 53.68 |
| EVO-H-2 | 50557018 | 7634109718 | 49870778 | 7321541467 | 0.0252 | 97.89 | 94.02 | 54.53 |
| EVO-H-3 | 64570782 | 9750188082 | 63552550 | 9325637220 | 0.0255 | 97.77 | 93.74 | 54.33 |
